# Supplementary material for: Post-hospital syndrome in adults with asthma: a case-crossover study
Source: PubMed Central journal article supplement (PMC3880050; doi:10.1186/1710-1492-9-49), 2013-12-23
Supplement: 1710-1492-9-49-S1.pdf [file 1710-1492-9-49-S1.pdf]

## Additional file 1

All medications are used in calculating the number of asthma-related dispensations as a covariate for asthma severity; but only a subset of the list is used for the case definition (refer to the right-most column)

| Medication categories                                                                                                   | Active ingredient(s)   | Anatomical Therapeutic Chemical (ATC) | Drug Identification Numbers (DIN)                                                                                                                                                                                                                                                                                                                                                                                                                                                                                       | Used in case definition? |
|-------------------------------------------------------------------------------------------------------------------------|------------------------|---------------------------------------|-------------------------------------------------------------------------------------------------------------------------------------------------------------------------------------------------------------------------------------------------------------------------------------------------------------------------------------------------------------------------------------------------------------------------------------------------------------------------------------------------------------------------|--------------------------|
| <b>Used in the 'narrow definition' of resource use (short list), also used for case-definition of asthma (see text)</b> |                        |                                       |                                                                                                                                                                                                                                                                                                                                                                                                                                                                                                                         |                          |
| Inhaled corticosteroids (ICS)                                                                                           | Beclomethasone         | R03BA01                               | 2242030, 2242029, 374407, 828521, 828548, 872334, 893633, 897353, 1949993, 1950002, 2079976, 2213710, 2213729, 2215039, 2215047, 2215055, 2216531                                                                                                                                                                                                                                                                                                                                                                       | Y                        |
|                                                                                                                         | Budesonide             | R03BA02                               | 2229099, 1978918, 1978926, 852074, 851752, 851760                                                                                                                                                                                                                                                                                                                                                                                                                                                                       | Y                        |
|                                                                                                                         | Fluticasone            | R03BA05                               | 2237247, 2237246, 2237245, 2237244, 2244293, 2244292, 2244291, 2174731, 2174758, 2174766, 2174774, 2213583, 2213591, 2213605, 2213613                                                                                                                                                                                                                                                                                                                                                                                   | Y                        |
|                                                                                                                         | Ciclesonide            | R03BA08                               | 2285614, 2285606, 2303671                                                                                                                                                                                                                                                                                                                                                                                                                                                                                               | Y                        |
| Short-acting beta-agonists (SABA)                                                                                       | Salbutamol             | R03AC02                               | 790419, 812463, 832758, 832766, 851841, 860808, 867179, 897345, 1926934, 1938851, 1938878, 1945203, 1947222, 1986864, 2022125, 2046741, 2048760, 2069571, 2084333, 2148617, 2154412, 2173360, 2208229, 2208237, 2208245, 2212315, 2212323, 2213400, 2213419, 2213427, 2213478, 2213486, 2214997, 2215004, 2215616, 2215624, 2215632, 2216949, 2231430, 2231488, 2231678, 2231783, 2231784, 2232570, 2232987, 2236931, 2236932, 2236933, 2239365, 2239366, 2241497, 2243115, 2243828, 2244914, 2245669, 2259583, 2326450 | Y                        |
|                                                                                                                         |                        | R03CC02                               | 620955, 620963, 874086, 894249, 894257, 1932691, 2035421, 2063689, 2091186, 2146843, 2146851, 2164434, 2164442, 2165368, 2165376, 2212390, 2213435, 2213443, 2213451, 2261324                                                                                                                                                                                                                                                                                                                                           | Y                        |
|                                                                                                                         | Terbutaline            | R03AC03                               | 786616                                                                                                                                                                                                                                                                                                                                                                                                                                                                                                                  | Y                        |
|                                                                                                                         | Orciprenaline          | R03CB03                               | 249920, 3891, 2236783, 2229862, 2152568, 2192675                                                                                                                                                                                                                                                                                                                                                                                                                                                                        | Y                        |
| Long-acting beta-agonists (LABA)                                                                                        | Salmeterol             | R03AC12                               | 2211742, 2214261, 2231129, 2136139, 2136147                                                                                                                                                                                                                                                                                                                                                                                                                                                                             | Y                        |
|                                                                                                                         | Formoterol             | R03AC13                               | 2230898, 2237224, 2237225                                                                                                                                                                                                                                                                                                                                                                                                                                                                                               | Y                        |
| ICS and LABA in combination (ICS+LABA)                                                                                  | Budesonide, formoterol | R03AK07                               | 2245385, 2245386                                                                                                                                                                                                                                                                                                                                                                                                                                                                                                        | Y                        |

|                                           |                                |                         |                                                                                                                                                                                                                                                                                                         |   |
|-------------------------------------------|--------------------------------|-------------------------|---------------------------------------------------------------------------------------------------------------------------------------------------------------------------------------------------------------------------------------------------------------------------------------------------------|---|
|                                           | Fluticasone, salmeterol        | R03AK06                 | 2240835, 2245126, 2245127, 2240836, 2240837                                                                                                                                                                                                                                                             | Y |
| Leukotriene receptor antagonists (LTRA)   | Montelukast                    | R03DC03                 | 2247997, 2238217, 2243602, 2238216                                                                                                                                                                                                                                                                      | Y |
|                                           | Zafirlukast                    | R03DC01                 | 2236606                                                                                                                                                                                                                                                                                                 | Y |
|                                           | <del>Zileuton</del>            | Not available in Canada |                                                                                                                                                                                                                                                                                                         |   |
| Anti-immunoglobulin E monoclonal antibody | Omalizumab                     | R03DX05                 | 2260565                                                                                                                                                                                                                                                                                                 | Y |
| Inhaled mast cell stabilizers             | Cromoglicic acid (cromolyn)    | R03BC01                 | 2231431, 2231671, 2046113, 534609, 555649, 261238, 638641, 2049082, 2219468                                                                                                                                                                                                                             | Y |
| Theophylline                              | Choline theophyllinate         | R03DA02                 | 346071, 405310, 441724, 441732, 451282, 458708, 458716, 476366, 476390, 476412, 503436, 511692, 536709, 565377, 589942, 589950, 792934                                                                                                                                                                  | Y |
|                                           | Theophylline                   | R03DA04                 | 156701, 261203, 460982, 460990, 461008, 466409, 488070, 532223, 556742, 575151, 599905, 627410, 631698, 631701, 692689, 692697, 692700, 722065, 1926586, 1926594, 1926608, 1926616, 1926640, 1966219, 1966227, 1966235, 1966243, 1966251, 1966278, 1966286, 2014165, 2014181, 2230085, 2230086, 2230087 | Y |
|                                           | Aminophylline                  | R03DA05                 | 14923, 178497, 497193, 497193, 497207, 582654, 582662, 868450, 2014270, 2014289                                                                                                                                                                                                                         | Y |
| Inhaled anticholinergics                  | Ipratropium bromide            | R01AX03                 | 2246084, 2246083, 2163705, 2163713, 2240508, 2240072                                                                                                                                                                                                                                                    | N |
|                                           |                                | R03BB01                 | 2126222, 2243827, 2231494, 731439, 576158, 2247686, 824216, 2026759, 1950681, 2239131, 2216221, 2210479, 2231785, 2236934, 2236935, 2237134, 2237135, 2239627, 2231135, 2231136, 2231245, 2231244, 2097141, 2097176, 2097168                                                                            | N |
|                                           | Ipratropium bromide, fenoterol | R03AK03                 | 02148633                                                                                                                                                                                                                                                                                                | N |
|                                           | Tiotropium bromide             | R03BB04                 | 02246793                                                                                                                                                                                                                                                                                                | N |
| Other beta-agonists                       | Epinephrine                    | R03AA01                 | 2017555, 466417, 525103, 1927582                                                                                                                                                                                                                                                                        | N |
|                                           | Ephedrine                      | R03CA02                 | 2237085, 2229698, 2100231, 2100258, 2243148, 2236722, 2229678, 2219743, 2012111, 2229711, 38121, 2242961, 876534, 893323, 893331, 438847, 2242639, 2126419, 2126400                                                                                                                                     | N |
|                                           | Isoprenaline                   | R03AB02                 | 2017652                                                                                                                                                                                                                                                                                                 | N |
|                                           | Orciprenaline                  | R03AB03                 | 1923870, 1928449, 2017660, 254134, 3859                                                                                                                                                                                                                                                                 | N |
| Other corticosteroids                     | Cortisone                      | H02AB10                 | 280437, 16241, 16446, 16438                                                                                                                                                                                                                                                                             | N |
|                                           | Triamcinolone                  | H02AB08                 | 2194090, 15016, 15024, 2194082                                                                                                                                                                                                                                                                          | N |

|                            |                           |         |                                                                                                                                                                                                                                                                                           |   |
|----------------------------|---------------------------|---------|-------------------------------------------------------------------------------------------------------------------------------------------------------------------------------------------------------------------------------------------------------------------------------------------|---|
|                            | Prednisone                | H02AB07 | 610623, 598194, 550957, 312770, 252417, 210188, 868426, 868434, 868442, 21695, 232378, 607517, 508586, 156876, 271373, 271381                                                                                                                                                             | N |
|                            | Prednisolone              | H02AB06 | 21679, 2230619, 2152541, 2245532                                                                                                                                                                                                                                                          | N |
|                            | Methylprednisolone        | H02AB04 | 1934325, 1934333, 1934341, 30759, 30767, 36129, 30988, 2245406, 2245400, 2245408, 2245407, 2241229, 2231893, 2231894, 2231895, 2232750, 2232748, 2063727, 2063697, 2063719, 2063700, 36137, 2230210, 2230211, 30678, 30651, 30643                                                         | N |
|                            | Betamethasone             | H02AB01 | 2237835, 36366, 2063190, 176834, 28096, 28185                                                                                                                                                                                                                                             | N |
|                            | Hydrocortisone            | H02AB09 | 888222, 888230, 888206, 888214, 30910, 30929, 872520, 872539, 878618, 878626, 30635, 30600, 30619, 30627                                                                                                                                                                                  | N |
|                            | Dexamethasone             | H02AB02 | 2261081, 2250055, 213624, 16462, 354309, 716715, 874582, 1977547, 664227, 2204274, 2204266, 295094, 285471, 489158, 2239534, 732893, 732885, 2260301, 2237044, 2260298, 2237046, 2237045, 1946897, 1964976, 1964968, 1964070, 2279363, 783900, 751863, 2311267, 2240687, 2240685, 2240684 | N |
| Other xanthines            | Theophylline, combination | R03DA54 | 545090, 476374, 334510, 356123, 792942, 721301, 317225, 828718, 640093, 828726, 828742, 307548                                                                                                                                                                                            | N |
| Other anti-allergic agents | Levocabastine             | R01AC02 | 2020017                                                                                                                                                                                                                                                                                   | N |
|                            | Ketotifen                 | R06AX17 | 2221330, 2176084, 2230730, 2218305, 2231680, 2231679, 600784, 577308                                                                                                                                                                                                                      | N |
